# Supplementary material for: Understanding the Role of Macroalgal Complexity and Allelochemicals Production in Invasive and Non-Invasive Macroalgae in the North-Western Adriatic Sea: Effect on the Associated Communities
Source: MDPI journal article supplement (doi:10.3390/w15091697), 2023-04-27
Supplement: s1 [file s1]

# Understanding the role of macroalgal complexity and allelochemicals production in invasive and non-invasive macroalgae in the north-western Adriatic Sea: effect on the associated communities

Denise Lenzo <sup>1</sup>, Marina Antonia Colangelo <sup>1,\*</sup>, Andrea Pasteris <sup>1</sup>, Fabio Rindi <sup>2</sup>, Rossella Pistocchi <sup>1</sup> and Laura Pezzolesi <sup>11</sup>

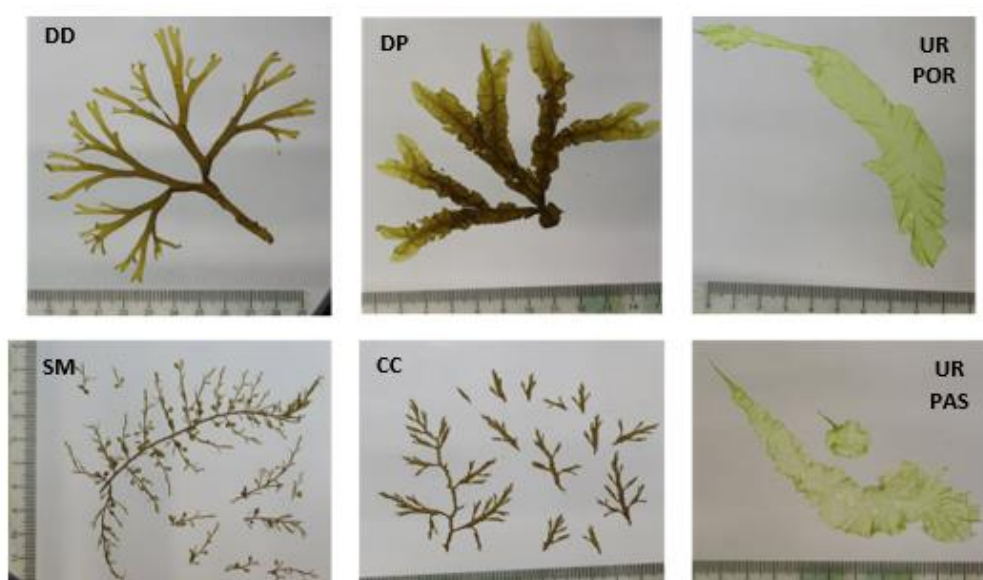

**Figure S1-** Macroalgae sampled in Passetto (PAS) and Porto (POR): *Cystoseira compressa* (CC), *Dictyota dichotoma* (DD), *Ulva cf. lacinulata* (UL), *Dictyopteris polypodioides* (DP) and *Sargassum muticum* (SM).

**Table S1.** Results of PCA carried out on the variables measured for macroalgal morphology.

|                | PC1    | PC2    | PC3    | PC4    |
|----------------|--------|--------|--------|--------|
| % variation    | 83.3   | 11.9   | 3.3    | 1.5    |
| D              | 0.478  | -0.676 | 0.206  | -0.522 |
| Weight/Area    | -0.513 | -0.283 | 0.783  | 0.206  |
| Perimeter/Area | -0.529 | 0.239  | -0.047 | -0.813 |
| Volume/Area    | -0.478 | -0.637 | -0.584 | 0.157  |

**Table S2.** Results of PERMANOVA and pairwise comparison test carried out on morphological measure taken in Passetto (PAS) and Porto (POR) for each macroalga: *Cystoseira compressa* (CC), *Dictyota dichotoma* (DD), *Ulva cf. lacinulata* (UL), *Dictyopteris polypodioides* (DP) and *Sargassum muticum* (SM).

| Source of Variation | df    | MS    | Pseudo-F | P(perm)       |
|---------------------|-------|-------|----------|---------------|
| Site-Macroalgae     | 7     | 16.60 | 50.86    | 0.0001        |
| Error               | 24    | 0.33  |          |               |
| Total:              | 31    |       |          |               |
| Comparisons         | P(MC) |       |          |               |
| PAS-CC vs PAS-DD    |       |       |          | <b>0.0001</b> |
| PAS-CC vs PAS-UL    |       |       |          | <b>0.0001</b> |
| PAS-CC vs PAS-DP    |       |       |          | <b>0.0002</b> |
| PAS-DD vs PAS-UL    |       |       |          | <b>0.0002</b> |
| PAS-DD vs PAS-DP    |       |       |          | <b>0.0026</b> |
| PAS-UL vs PAS-DP    |       |       |          | <b>0.0013</b> |
| POR-SM vs POR-DD    |       |       |          | <b>0.0001</b> |
| POR-SM vs POR-UL    |       |       |          | <b>0.0003</b> |
| POR-SM vs POR-DP    |       |       |          | <b>0.0001</b> |
| POR-DD vs POR-UL    |       |       |          | <b>0.0006</b> |
| POR-DD vs POR-DP    |       |       |          | <b>0.0005</b> |
| POR-UL vs POR-DP    |       |       |          | 0.1091        |
| PAS-DD vs POR-DD    |       |       |          | <b>0.0212</b> |
| PAS-UL vs POR-UL    |       |       |          | 0.1813        |
| PAS-DP vs POR-DP    |       |       |          | 0.1203        |

**Table S3.** Results of one-way PERMANOVA and pairwise comparisons carried out on the total concentration of PUAs taken in Passetto (PAS) and Porto (POR) for each macroalga: *Cystoseira compressa* (CC), *Dictyota dichotoma* (DD), *Ulva cf. lacinulata* (UL), *Dictyopteris polypodioides* (DP) and *Sargassum muticum* (SM).

| Source of Variation | df    | MS        | Pseudo-F     | P(perm) |
|---------------------|-------|-----------|--------------|---------|
| Site-Macroalgae     | 7     | 721740.00 | 14.39        | 0.0003  |
| Error               | 24    | 50160.00  |              |         |
| Total:              | 31    |           |              |         |
| Comparisons         | P(MC) |           |              |         |
| PAS-CC vs PAS-DD    |       |           | <b>0.010</b> |         |
| PAS-CC vs PAS-UL    |       |           | 0.065        |         |
| PAS-CC vs PAS-DP    |       |           | <b>0.003</b> |         |
| PAS-DD vs PAS-UL    |       |           | <b>0.013</b> |         |
| PAS-DD vs PAS-DP    |       |           | <b>0.005</b> |         |
| PAS-UL vs PAS-DP    |       |           | <b>0.003</b> |         |
| POR-SM vs POR-DD    |       |           | 0.700        |         |
| POR-SM vs POR-UL    |       |           | <b>0.014</b> |         |
| POR-SM vs POR-DP    |       |           | 0.985        |         |
| POR-DD vs POR-UL    |       |           | <b>0.012</b> |         |
| POR-DD vs POR-DP    |       |           | 0.824        |         |
| POR-UL vs POR-DP    |       |           | <b>0.014</b> |         |
| PAS-DD vs POR-DD    |       |           | 0.155        |         |
| PAS-UL vs POR-UL    |       |           | <b>0.013</b> |         |
| PAS-DP vs POR-DP    |       |           | <b>0.004</b> |         |

**Table S4.** Microphytobenthos assemblages (cells/cm<sup>2</sup>) associated to the macroalgae collected in Passetto (PAS) and Porto (POR): *Cystoseira compressa* (CC), *Dictyota dichotoma* (DD), *Ulva* cf. *lacunculata* (UL), *Dictyopteris polypodioides* (DP) and *Sargassum muticum* (SM).

|                               | PAS-CC               | PAS-DD               | PAS-UL               | PAS-DP               | POR-SM               | POR-DD               | POR-UL               | POR-DP               |
|-------------------------------|----------------------|----------------------|----------------------|----------------------|----------------------|----------------------|----------------------|----------------------|
|                               | cell/cm <sup>2</sup> |
| <i>Amphora</i> spp.           | 345 ± 137            | 243 ± 60             | 41 ± 9               | 1368 ± 794           | -                    | 99 ± 69              | 55 ± 55              | -                    |
| <i>Ardissonea</i> spp.        | 2 ± 1                | -                    | 1 ± 1                | -                    | -                    | -                    | -                    | -                    |
| <i>Chaetoceros</i> spp.       | -                    | -                    | -                    | -                    | -                    | -                    | 3 ± 3                | -                    |
| <i>Cocconeis</i> spp.         | 3697 ± 596           | 170 ± 96             | 1446 ± 390           | 7743 ± 2002          | 2712 ± 1092          | 1146 ± 218           | 68 ± 44              | 690 ± 132            |
| <i>Cylindrotheca</i> spp.     | 409 ± 325            | 778 ± 287            | 98 ± 28              | 1434 ± 1022          | 2524 ± 1379          | 41 ± 29              | -                    | 100 ± 62             |
| <i>Entomoneis</i> spp.        | 478 ± 110            | 442 ± 123            | 82 ± 27              | 670 ± 330            | 16 ± 16              | -                    | 3 ± 3                | -                    |
| <i>Fragilariopsis</i> spp.    | -                    | -                    | -                    | -                    | 390 ± 204            | -                    | -                    | -                    |
| <i>Grammatophora</i> spp.     | -                    | -                    | -                    | -                    | 12 ± 12              | 6 ± 2                | -                    | -                    |
| <i>Leptocylindrus</i> spp.    | 16099 ± 2502         | 814 ± 414            | -                    | 140 ± 91             | 1666 ± 637           | 1376 ± 819           | 3 ± 3                | 143 ± 52             |
| <i>Licmophora</i> spp.        | 2229 ± 928           | 577 ± 240            | 351 ± 173            | 783 ± 378            | 2888 ± 1388          | 1144 ± 515           | 5 ± 3                | 191 ± 103            |
| <i>Meringosphaera</i> spp.    | 121 ± 59             | 66 ± 26              | 51 ± 26              | 4 ± 4                | 130 ± 87             | 29 ± 14              | 2 ± 2                | -                    |
| <i>Meuniera membranacea</i>   | 163 ± 84             | 168 ± 55             | 5 ± 5                | 356 ± 153            | -                    | -                    | -                    | -                    |
| <i>Navicula</i> spp.          | 5221 ± 1538          | 17360 ± 4267         | 4521 ± 1997          | 16644 ± 3759         | 5750 ± 2114          | 11568 ± 1720         | 268 ± 184            | 5911 ± 342           |
| <i>Nitzschia</i> spp.         | 1227 ± 232           | 713 ± 155            | 140 ± 30             | 2551 ± 849           | 21321 ± 9841         | 112 ± 57             | 33 ± 5               | 2341 ± 1020          |
| <i>Pleurosigma</i> spp.       | 3 ± 2                | 1 ± 1                | -                    | 2 ± 1                | -                    | -                    | -                    | 1 ± 0                |
| <i>Pseudo-nitzschia</i> spp.  | -                    | -                    | -                    | -                    | 1761 ± 704           | -                    | -                    | -                    |
| <i>Striatella unipunctata</i> | 1 ± 1                | -                    | 2 ± 1                | -                    | -                    | -                    | -                    | -                    |
| <i>Thalassionema</i> spp.     | 49 ± 49              | -                    | 497 ± 425            | -                    | -                    | -                    | -                    | -                    |
| <i>Toxarium</i> spp.          | -                    | -                    | -                    | -                    | -                    | -                    | -                    | -                    |
| undetermined centric diatoms  | 213 ± 213            | 305 ± 116            | 24 ± 14              | 446 ± 265            | -                    | 59 ± 35              | 3 ± 3                | -                    |
| undetermined pennate diatoms  | 1642 ± 1298          | 13420 ± 3414         | 988 ± 302            | 4510 ± 2720          | 5729 ± 1842          | 16885 ± 3810         | 8 ± 8                | 5110 ± 1014          |
| <i>Alexandrium</i> spp.       | 2 ± 1                | -                    | 3 ± 1                | 12 ± 6               | -                    | -                    | -                    | -                    |
| <i>Amphidinium</i> sp.        | 660 ± 262            | 1928 ± 280           | 321 ± 88             | 1819 ± 664           | -                    | -                    | -                    | -                    |
| cf. <i>Gyrodinium</i>         | -                    | -                    | -                    | 0 ± 0                | -                    | -                    | 8 ± 8                | -                    |
| cf. <i>Heterocapsa</i>        | 74 ± 40              | 83 ± 83              | 38 ± 23              | 151 ± 105            | -                    | 332 ± 144            | 2 ± 2                | -                    |
| <i>Dinoflagellata</i> sp.1    | -                    | -                    | -                    | 33 ± 33              | -                    | 17 ± 17              | 8 ± 8                | -                    |
| <i>Dinoflagellata</i> sp.2    | -                    | -                    | -                    | 1 ± 1                | -                    | -                    | 155 ± 148            | -                    |
| <i>Prorocentrum lima</i>      | 2 ± 1                | -                    | 1 ± 0                | 15 ± 10              | -                    | -                    | 19 ± 19              | -                    |
| <i>Prorocentrum micans</i>    | 2 ± 1                | 1 ± 1                | -                    | -                    | 2 ± 1                | 1 ± 0                | -                    | 1 ± 1                |
| microalgal cells < 20µm       | 1830 ± 664           | 9343 ± 2599          | 2996 ± 2661          | 411 ± 248            | 179 ± 86             | -                    | 1835 ± 1494          | -                    |
| <b>tot</b>                    | <b>34470</b>         | <b>46412</b>         | <b>11606</b>         | <b>39093</b>         | <b>45080</b>         | <b>32814</b>         | <b>2480</b>          | <b>14488</b>         |

**Table S5.** Results of one-way PERMANOVA and pairwise comparisons carried out on the number of taxa (S) and on total density (N) of microphytobenthos taken in Passetto (PAS) and Porto (POR) for each macroalga: *Cystoseira compressa* (CC), *Dictyota dichotoma* (DD), *Ulva cf. lacinulata* (UL), *Dictyopteris polypodioides* (DP) and *Sargassum muticum* (SM).

|                     |    | N° of Taxa   |          |         | Total abundance |          |         |
|---------------------|----|--------------|----------|---------|-----------------|----------|---------|
| Source of Variation | df | MS           | Pseudo-F | P(perm) | MS              | Pseudo-F | P(perm) |
| Site-Macroalgae     | 7  | 41.89        | 10.50    | 0.0001  | 1.1E+09         | 4.613    | 0.003   |
| Error               | 24 | 3.99         |          |         | 2.4E+08         |          |         |
| Total:              | 31 |              |          |         |                 |          |         |
| Comparisons         |    | P(MC)        |          |         | P(MC)           |          |         |
| PAS-CC vs PAS-DD    |    | 0.414        |          |         | 0.248           |          |         |
| PAS-CC vs PAS-UL    |    | 0.270        |          |         | <b>0.009</b>    |          |         |
| PAS-CC vs PAS-DP    |    | 0.367        |          |         | 0.714           |          |         |
| PAS-DD vs PAS-UL    |    | 0.105        |          |         | <b>0.010</b>    |          |         |
| PAS-DD vs PAS-DP    |    | 0.805        |          |         | 0.612           |          |         |
| PAS-UL vs PAS-DP    |    | 0.119        |          |         | 0.057           |          |         |
| POR-SM vs POR-DD    |    | 0.321        |          |         | 0.468           |          |         |
| POR-SM vs POR-UL    |    | 0.082        |          |         | <b>0.028</b>    |          |         |
| POR-SM vs POR-DP    |    | <b>0.002</b> |          |         | 0.085           |          |         |
| POR-DD vs POR-UL    |    | 0.144        |          |         | <b>0.002</b>    |          |         |
| POR-DD vs POR-DP    |    | <b>0.000</b> |          |         | <b>0.017</b>    |          |         |
| POR-UL vs POR-DP    |    | 0.593        |          |         | <b>0.001</b>    |          |         |
| PAS-DD vs POR-DD    |    | <b>0.029</b> |          |         | 0.229           |          |         |
| PAS-UL vs POR-UL    |    | <b>0.003</b> |          |         | 0.093           |          |         |
| PAS-DP vs POR-DP    |    | 0.128        |          |         | 0.617           |          |         |

**Table S6.** Results of PERMANOVA and pairwise comparison test carried out on microphytobenthos community, taken in Passetto (PAS) and Porto (POR) for each macroalga: *Cystoseira compressa* (CC), *Dictyota dichotoma* (DD), *Ulva* cf. *lacinulata* (UL), *Dictyopteris polypodioides* (DP) and *Sargassum muticum* (SM).

|                     |    | Multivariate structure |          |         |
|---------------------|----|------------------------|----------|---------|
| Source of Variation | df | MS                     | Pseudo-F | P(perm) |
| Site-Macroalgae     | 7  | 3584.10                | 8.59     | 0.0001  |
| Error               | 24 | 417.00                 |          |         |
| Total:              | 31 |                        |          |         |
| Comparisons         |    | P(MC)                  |          |         |
| PAS-CC vs PAS-DD    |    | <b>0.011</b>           |          |         |
| PAS-CC vs PAS-UL    |    | <b>0.007</b>           |          |         |
| PAS-CC vs PAS-DP    |    | 0.227                  |          |         |
| PAS-DD vs PAS-UL    |    | <b>0.002</b>           |          |         |
| PAS-DD vs PAS-DP    |    | 0.075                  |          |         |
| PAS-UL vs PAS-DP    |    | 0.052                  |          |         |
| POR-SM vs POR-DD    |    | <b>0.003</b>           |          |         |
| POR-SM vs POR-UL    |    | <b>0.002</b>           |          |         |
| POR-SM vs POR-DP    |    | <b>0.008</b>           |          |         |
| POR-DD vs POR-UL    |    | <b>0.002</b>           |          |         |
| POR-DD vs POR-DP    |    | <b>0.002</b>           |          |         |
| POR-UL vs POR-DP    |    | <b>0.001</b>           |          |         |
| PAS-DD vs POR-DD    |    | <b>0.001</b>           |          |         |
| PAS-UL vs POR-UL    |    | <b>0.005</b>           |          |         |
| PAS-DP vs POR-DP    |    | <b>0.011</b>           |          |         |

**Table S7.** Results of SIMPER analysis based on four root transformed data, used to identify organisms that mostly contribute to microphytobenthos dissimilarity among site-macroalgae (Cut-off 60%). Av.Ab, mean abundance; Diss, mean dissimilarity; Diss/SD, dissimilarity/standard deviation; Contrib%, contribution relative to single taxon; Cum%, cumulative contribution.

| Groups PAS-CC & PAS-DD       |              | Average dissimilarity = 30.19 |         |         |          |       |  |
|------------------------------|--------------|-------------------------------|---------|---------|----------|-------|--|
|                              | Group PAS-CC | Group PAS-DD                  |         |         |          |       |  |
| Species                      | Av.Abund     | Av.Abund                      | Av.Diss | Diss/SD | Contrib% | Cum.% |  |
| <i>Leptocylindrus</i> spp.   | 11.19        | 4.96                          | 3.92    | 3.91    | 12.99    | 12.99 |  |
| undetermined pennate diatoms | 4.52         | 10.57                         | 3.80    | 1.74    | 12.60    | 25.58 |  |
| <i>Cocconeis</i> spp.        | 7.73         | 2.79                          | 3.09    | 2.72    | 10.24    | 35.82 |  |
| microalgal cells < 20µm      | 5.25         | 9.65                          | 2.73    | 1.34    | 9.03     | 44.85 |  |
| undetermined centric diatoms | 1.35         | 3.99                          | 2.10    | 2.38    | 6.95     | 51.81 |  |
| <i>Navicula</i> spp.         | 8.30         | 11.26                         | 1.87    | 1.88    | 6.18     | 57.99 |  |
| <i>Licmophora</i> spp.       | 6.54         | 3.88                          | 1.80    | 1.04    | 5.96     | 63.95 |  |
| Groups PAS-CC & PAS-UL       |              | Average dissimilarity = 35.37 |         |         |          |       |  |
|                              | Group PAS-CC | Group PAS-UL                  |         |         |          |       |  |
| Species                      | Av.Abund     | Av.Abund                      | Av.Diss | Diss/SD | Contrib% | Cum.% |  |
| <i>Leptocylindrus</i> spp.   | 11.19        | 0.00                          | 8.14    | 9.84    | 23.03    | 23.03 |  |
| microalgal cells < 20µm      | 5.25         | 5.65                          | 2.60    | 2.17    | 7.36     | 30.38 |  |
| <i>Thalassionema</i> spp.    | 0.94         | 3.24                          | 2.03    | 1.38    | 5.75     | 36.13 |  |
| undetermined pennate diatoms | 4.52         | 5.33                          | 2.03    | 1.37    | 5.74     | 41.87 |  |
| <i>Meuniera membranacea</i>  | 2.80         | 0.52                          | 1.87    | 1.52    | 5.27     | 47.14 |  |
| <i>Licmophora</i> spp.       | 6.54         | 4.10                          | 1.84    | 1.74    | 5.20     | 52.35 |  |
| <i>Nitzschia</i> spp.        | 5.86         | 3.37                          | 1.82    | 3.50    | 5.15     | 57.50 |  |
| <i>Amphidinium</i> sp.       | 4.05         | 4.13                          | 1.45    | 1.40    | 4.10     | 61.59 |  |
| Groups PAS-DD & PAS-UL       |              | Average dissimilarity = 36.40 |         |         |          |       |  |
|                              | Group PAS-DD | Group PAS-UL                  |         |         |          |       |  |
| Species                      | Av.Abund     | Av.Abund                      | Av.Diss | Diss/SD | Contrib% | Cum.% |  |
| undetermined pennate diatoms | 10.57        | 5.33                          | 3.83    | 2.88    | 10.52    | 10.52 |  |
| <i>Leptocylindrus</i> spp.   | 4.96         | 0.00                          | 3.57    | 4.70    | 9.80     | 20.32 |  |
| microalgal cells < 20µm      | 9.65         | 5.65                          | 3.32    | 1.91    | 9.11     | 29.43 |  |
| <i>Navicula</i> spp.         | 11.26        | 7.77                          | 2.57    | 1.82    | 7.07     | 36.50 |  |
| <i>Cocconeis</i> spp.        | 2.79         | 6.00                          | 2.30    | 1.67    | 6.32     | 42.82 |  |
| <i>Thalassionema</i> spp.    | 0.00         | 3.24                          | 2.26    | 1.49    | 6.21     | 49.03 |  |
| <i>Meuniera membranacea</i>  | 3.49         | 0.52                          | 2.21    | 2.45    | 6.08     | 55.10 |  |
| undetermined centric diatoms | 3.99         | 1.31                          | 1.99    | 1.64    | 5.46     | 60.56 |  |
| Groups PAS-CC & PAS-DP       |              | Average dissimilarity = 35.20 |         |         |          |       |  |
|                              | Group PAS-CC | Group PAS-DP                  |         |         |          |       |  |
| Species                      | Av.Abund     | Av.Abund                      | Av.Diss | Diss/SD | Contrib% | Cum.% |  |
| <i>Leptocylindrus</i> spp.   | 11.19        | 2.60                          | 5.82    | 3.29    | 16.54    | 16.54 |  |
| undetermined pennate diatoms | 4.52         | 4.85                          | 3.22    | 1.44    | 9.14     | 25.68 |  |
| microalgal cells < 20µm      | 5.25         | 2.66                          | 2.72    | 1.21    | 7.72     | 33.40 |  |
| <i>Amphidinium</i> sp.       | 4.05         | 5.24                          | 2.20    | 1.17    | 6.26     | 39.66 |  |
| <i>Cylindrotheca</i> spp.    | 3.19         | 4.05                          | 2.13    | 1.56    | 6.06     | 45.72 |  |
| <i>Licmophora</i> spp.       | 6.54         | 4.15                          | 2.09    | 0.89    | 5.93     | 51.65 |  |
| <i>Navicula</i> spp.         | 8.30         | 11.13                         | 1.85    | 2.17    | 5.26     | 56.90 |  |
| undetermined centric diatoms | 1.35         | 2.73                          | 1.70    | 0.96    | 4.82     | 61.73 |  |
| Groups PAS-DD & PAS-DP       |              | Average dissimilarity = 35.12 |         |         |          |       |  |

|                              |  | Group PAS-DD                  | Group PAS-DP |         |         |          |       |
|------------------------------|--|-------------------------------|--------------|---------|---------|----------|-------|
| Species                      |  | Av.Abund                      | Av.Abund     | Av.Diss | Diss/SD | Contrib% | Cum.% |
| microalgal cells < 20µm      |  | 9.65                          | 2.66         | 4.83    | 1.85    | 13.74    | 13.74 |
| undetermined pennate diatoms |  | 10.57                         | 4.85         | 4.43    | 1.10    | 12.63    | 26.37 |
| <i>Cocconeis</i> spp.        |  | 2.79                          | 9.17         | 4.16    | 3.19    | 11.84    | 38.21 |
| <i>Cylindrotheca</i> spp.    |  | 5.09                          | 4.05         | 2.11    | 1.78    | 6.01     | 44.22 |
| undetermined centric diatoms |  | 3.99                          | 2.73         | 1.96    | 1.47    | 5.59     | 49.81 |
| <i>Licmophora</i> spp.       |  | 3.88                          | 4.15         | 1.76    | 0.96    | 5.00     | 54.81 |
| <i>Amphidinium</i> sp.       |  | 6.58                          | 5.24         | 1.71    | 0.69    | 4.88     | 59.69 |
| <i>Leptocylindrus</i> spp.   |  | 4.96                          | 2.60         | 1.68    | 1.34    | 4.78     | 64.48 |
| Groups PAS-UL & PAS-DP       |  | Average dissimilarity = 40.37 |              |         |         |          |       |
|                              |  | Group PAS-UL                  | Group PAS-DP |         |         |          |       |
| Species                      |  | Av.Abund                      | Av.Abund     | Av.Diss | Diss/SD | Contrib% | Cum.% |
| undetermined pennate diatoms |  | 5.33                          | 4.85         | 3.92    | 2.46    | 9.72     | 9.72  |
| microalgal cells < 20µm      |  | 5.65                          | 2.66         | 3.09    | 1.27    | 7.66     | 17.37 |
| <i>Navicula</i> spp.         |  | 7.77                          | 11.13        | 2.62    | 2.13    | 6.50     | 23.87 |
| <i>Amphidinium</i> sp.       |  | 4.13                          | 5.24         | 2.61    | 2.07    | 6.46     | 30.33 |
| <i>Thalassionema</i> spp.    |  | 3.24                          | 0.00         | 2.47    | 1.40    | 6.11     | 36.45 |
| <i>Cocconeis</i> spp.        |  | 6.00                          | 9.17         | 2.39    | 2.12    | 5.93     | 42.37 |
| <i>Nitzschia</i> spp.        |  | 3.37                          | 6.46         | 2.35    | 2.09    | 5.82     | 48.19 |
| <i>Meuniera membranacea</i>  |  | 0.52                          | 3.45         | 2.29    | 1.56    | 5.66     | 53.86 |
| <i>Cylindrotheca</i> spp.    |  | 3.04                          | 4.05         | 2.20    | 2.30    | 5.44     | 59.30 |
| <i>Leptocylindrus</i> spp.   |  | 0.00                          | 2.60         | 2.01    | 1.55    | 4.97     | 64.26 |
| Groups POR-SM & POR-DD       |  | Average dissimilarity = 41.06 |              |         |         |          |       |
|                              |  | Group POR-SM                  | Group POR-DD |         |         |          |       |
| Species                      |  | Av.Abund                      | Av.Abund     | Av.Diss | Diss/SD | Contrib% | Cum.% |
| <i>Nitzschia</i> spp.        |  | 10.94                         | 3.02         | 6.18    | 2.59    | 15.05    | 15.05 |
| <i>Pseudo-nitzschia</i> spp. |  | 6.03                          | 0.00         | 4.79    | 6.08    | 11.66    | 26.71 |
| cf. <i>Heterocapsa</i>       |  | 0.00                          | 4.03         | 3.32    | 3.54    | 8.10     | 34.81 |
| <i>Leptocylindrus</i> spp.   |  | 6.04                          | 3.61         | 3.10    | 1.37    | 7.56     | 42.37 |
| <i>Cylindrotheca</i> spp.    |  | 5.69                          | 1.87         | 3.06    | 1.47    | 7.46     | 49.83 |
| microalgal cells < 20µm      |  | 3.45                          | 0.00         | 2.79    | 5.61    | 6.78     | 56.61 |
| <i>Fragilariopsis</i> spp.   |  | 3.47                          | 0.00         | 2.61    | 1.59    | 6.35     | 62.96 |
| Groups POR-SM & POR-UL       |  | Average dissimilarity = 68.84 |              |         |         |          |       |
|                              |  | Group POR-SM                  | Group POR-UL |         |         |          |       |
| Species                      |  | Av.Abund                      | Av.Abund     | Av.Diss | Diss/SD | Contrib% | Cum.% |
| <i>Nitzschia</i> spp.        |  | 10.94                         | 2.38         | 8.76    | 3.27    | 12.72    | 12.72 |
| undetermined pennate diatoms |  | 8.36                          | 0.60         | 8.20    | 6.66    | 11.91    | 24.63 |
| <i>Pseudo-nitzschia</i> spp. |  | 6.03                          | 0.00         | 6.31    | 7.53    | 9.17     | 33.80 |
| <i>Leptocylindrus</i> spp.   |  | 6.04                          | 0.46         | 6.03    | 3.59    | 8.76     | 42.56 |
| <i>Cylindrotheca</i> spp.    |  | 5.69                          | 0.00         | 5.71    | 2.50    | 8.30     | 50.86 |
| <i>Licmophora</i> spp.       |  | 6.41                          | 0.89         | 5.68    | 2.44    | 8.25     | 59.11 |
| <i>Navicula</i> spp.         |  | 8.24                          | 3.54         | 4.79    | 2.74    | 6.96     | 66.07 |
| Groups POR-DD & POR-UL       |  | Average dissimilarity = 69.46 |              |         |         |          |       |
|                              |  | Group POR-DD                  | Group POR-UL |         |         |          |       |
| Species                      |  | Av.Abund                      | Av.Abund     | Av.Diss | Diss/SD | Contrib% | Cum.% |
| undetermined pennate diatoms |  | 11.26                         | 0.60         | 13.69   | 8.71    | 19.70    | 19.70 |



|                              |          |                               |              |         |          |       |
|------------------------------|----------|-------------------------------|--------------|---------|----------|-------|
| <i>Navicula</i> spp.         | 10.30    | 3.54                          | 8.76         | 4.42    | 12.61    | 32.31 |
| microalgal cells < 20µm      | 0.00     | 5.41                          | 7.02         | 2.40    | 10.10    | 42.42 |
| <i>Licmophora</i> spp.       | 5.03     | 0.89                          | 5.23         | 1.94    | 7.53     | 49.94 |
| cf. <i>Heterocapsa</i>       | 4.03     | 0.42                          | 4.72         | 2.84    | 6.79     | 56.73 |
| <i>Leptocylindrus</i> spp.   | 3.61     | 0.46                          | 4.44         | 1.07    | 6.39     | 63.12 |
| Groups POR-SM & POR-DP       |          | Average dissimilarity = 33.59 |              |         |          |       |
|                              |          | Group POR-SM                  | Group POR-DP |         |          |       |
| Species                      | Av.Abund | Av.Abund                      | Av.Diss      | Diss/SD | Contrib% | Cum.% |
| <i>Pseudo-nitzschia</i> spp. | 6.03     | 0.00                          | 5.40         | 6.75    | 16.08    | 16.08 |
| <i>Nitzschia</i> spp.        | 10.94    | 6.42                          | 4.35         | 1.74    | 12.94    | 29.02 |
| microalgal cells < 20µm      | 3.45     | 0.00                          | 3.15         | 5.67    | 9.38     | 38.40 |
| <i>Licmophora</i> spp.       | 6.41     | 3.31                          | 2.99         | 1.64    | 8.90     | 47.30 |
| <i>Fragilariopsis</i> spp.   | 3.47     | 0.00                          | 2.91         | 1.59    | 8.68     | 55.98 |
| <i>Cylindrotheca</i> spp.    | 5.69     | 2.84                          | 2.79         | 1.42    | 8.31     | 64.28 |
| Groups POR-DD & POR-DP       |          | Average dissimilarity = 31.50 |              |         |          |       |
|                              |          | Group POR-DD                  | Group POR-DP |         |          |       |
| Species                      | Av.Abund | Av.Abund                      | Av.Diss      | Diss/SD | Contrib% | Cum.% |
| cf. <i>Heterocapsa</i>       | 4.03     | 0.00                          | 4.35         | 4.23    | 13.80    | 13.80 |
| <i>Leptocylindrus</i> spp.   | 3.61     | 3.29                          | 3.87         | 4.71    | 12.28    | 26.08 |
| <i>Nitzschia</i> spp.        | 3.02     | 6.42                          | 3.69         | 1.84    | 11.72    | 37.80 |
| undetermined pennate diatoms | 11.26    | 8.37                          | 3.04         | 2.60    | 9.67     | 47.47 |
| <i>Amphora</i> spp.          | 2.35     | 0.00                          | 2.61         | 1.49    | 8.29     | 55.76 |
| <i>Licmophora</i> spp.       | 5.03     | 3.31                          | 2.56         | 1.72    | 8.14     | 63.89 |
| Groups POR-UL & POR-DP       |          | Average dissimilarity = 66.52 |              |         |          |       |
|                              |          | Group POR-UL                  | Group POR-DP |         |          |       |
| Species                      | Av.Abund | Av.Abund                      | Av.Diss      | Diss/SD | Contrib% | Cum.% |
| undetermined pennate diatoms | 0.60     | 8.37                          | 12.25        | 5.69    | 18.41    | 18.41 |
| microalgal cells < 20µm      | 5.41     | 0.00                          | 8.57         | 2.40    | 12.88    | 31.30 |
| <i>Navicula</i> spp.         | 3.54     | 8.76                          | 8.25         | 4.23    | 12.40    | 43.70 |
| <i>Nitzschia</i> spp.        | 2.38     | 6.42                          | 6.34         | 2.36    | 9.53     | 53.22 |
| <i>Leptocylindrus</i> spp.   | 0.46     | 3.29                          | 4.46         | 2.69    | 6.70     | 59.92 |
| <i>Cylindrotheca</i> spp.    | 0.00     | 2.84                          | 4.44         | 4.12    | 6.68     | 66.60 |
| Groups PAS-UL & POR-UL       |          | Average dissimilarity = 58.36 |              |         |          |       |
|                              |          | Group PAS-UL                  | Group POR-UL |         |          |       |
| Species                      | Av.Abund | Av.Abund                      | Av.Diss      | Diss/SD | Contrib% | Cum.% |
| undetermined pennate diatoms | 5.33     | 0.60                          | 5.73         | 3.15    | 9.82     | 9.82  |
| <i>Navicula</i> spp.         | 7.77     | 3.54                          | 5.20         | 2.09    | 8.90     | 18.72 |
| <i>Amphidinium</i> sp.       | 4.13     | 0.00                          | 5.05         | 8.02    | 8.66     | 27.38 |
| <i>Cocconeis</i> spp.        | 6.00     | 2.58                          | 4.16         | 2.99    | 7.12     | 34.50 |
| <i>Licmophora</i> spp.       | 4.10     | 0.89                          | 3.85         | 3.06    | 6.61     | 41.10 |
| <i>Thalassionema</i> spp.    | 3.24     | 0.00                          | 3.76         | 1.57    | 6.44     | 47.54 |
| <i>Cylindrotheca</i> spp.    | 3.04     | 0.00                          | 3.72         | 5.55    | 6.37     | 53.91 |
| <i>Entomoneis</i> spp.       | 2.91     | 0.46                          | 2.97         | 2.65    | 5.09     | 59.00 |
| microalgal cells < 20µm      | 5.65     | 5.41                          | 2.92         | 1.08    | 5.00     | 64.00 |
| Groups PAS-DP & POR-DP       |          | Average dissimilarity = 46.16 |              |         |          |       |
|                              |          | Group PAS-DP                  | Group POR-DP |         |          |       |
| Species                      | Av.Abund | Av.Abund                      | Av.Diss      | Diss/SD | Contrib% | Cum.% |
| undetermined pennate diatoms | 4.85     | 8.37                          | 5.32         | 1.12    | 11.52    | 11.52 |

|                             |                               |      |      |      |      |       |
|-----------------------------|-------------------------------|------|------|------|------|-------|
| <i>Amphora</i> spp.         | 5.25                          | 0.00 | 4.47 | 4.77 | 9.68 | 21.20 |
| <i>Amphidinium</i> sp.      | 5.24                          | 0.00 | 4.12 | 1.67 | 8.93 | 30.13 |
| <i>Entomoneis</i> spp.      | 4.50                          | 0.00 | 3.85 | 7.18 | 8.35 | 38.48 |
| <i>Cocconeis</i> spp.       | 9.17                          | 5.07 | 3.63 | 3.90 | 7.86 | 46.34 |
| <i>Meuniera membranacea</i> | 3.45                          | 0.00 | 2.76 | 1.55 | 5.97 | 52.31 |
| <i>Cylindrotheca</i> spp.   | 4.05                          | 2.84 | 2.50 | 1.97 | 5.42 | 57.74 |
| <i>Licmophora</i> spp.      | 4.15                          | 3.31 | 2.42 | 1.47 | 5.25 | 62.99 |
| Groups PAS-DD & POR-DD      | Average dissimilarity = 40.42 |      |      |      |      |       |

|                             | Group PAS-DD | Group POR-DD |         |         |          |       |
|-----------------------------|--------------|--------------|---------|---------|----------|-------|
| Species                     | Av.Abund     | Av.Abund     | Av.Diss | Diss/SD | Contrib% | Cum.% |
| microalgal cells < 20µm     | 9.65         | 0.00         | 7.19    | 9.85    | 17.79    | 17.79 |
| <i>Amphidinium</i> sp.      | 6.58         | 0.00         | 4.92    | 10.80   | 12.17    | 29.96 |
| <i>Entomoneis</i> spp.      | 4.46         | 0.00         | 3.35    | 5.03    | 8.29     | 38.25 |
| <i>Leptocylindrus</i> spp.  | 4.96         | 3.61         | 2.74    | 1.96    | 6.77     | 45.02 |
| <i>Meuniera membranacea</i> | 3.49         | 0.00         | 2.62    | 5.61    | 6.47     | 51.49 |
| cf. <i>Heterocapsa</i>      | 1.07         | 4.03         | 2.43    | 1.85    | 6.02     | 57.51 |
| <i>Cylindrotheca</i> spp.   | 5.09         | 1.87         | 2.42    | 2.11    | 5.98     | 63.49 |

**Table S8.** Meiofauna assemblages (cells/cm<sup>2</sup>) associated to the macroalgae collected in Passetto (PAS) and Porto (POR): *Cystoseira compressa* (CC), *Dictyota dichotoma* (DD), *Ulva cf. lacinulata* (UL), *Dictyopteris polypodioides* (DP) and *Sargassum muticum* (SM).

|                        | PAS-CC      | PAS-DD      | PAS-UL      | PAS-DP      | POR-SM       | POR-DD      | POR-UL      | POR-DP      |
|------------------------|-------------|-------------|-------------|-------------|--------------|-------------|-------------|-------------|
| Nematoda               | 0.04 ± 0.04 | 0.23 ± 0.23 | 0.06 ± 0.02 | 0.47 ± 0.07 | 0.17 ± 0.17  |             |             |             |
| Kinorhyncha            |             |             |             | 0.08 ± 0.08 |              |             |             |             |
| Ostracoda              |             |             |             | 0.12 ± 0.08 |              |             | 0.03 ± 0.03 | 0.14 ± 0.08 |
| Harpacticoida          | 0.60 ± 0.16 | 2.11 ± 0.21 | 0.25 ± 0.02 | 3.58 ± 0.82 | 1.46 ± 0.38  | 0.40 ± 0.23 | 0.20 ± 0.10 | 1.58 ± 0.33 |
| Copepod <i>nauplii</i> | 1.84 ± 0.42 | 2.79 ± 0.38 | 0.97 ± 0.21 | 1.33 ± 0.66 | 13.17 ± 8.10 | 1.65 ± 0.42 | 1.77 ± 0.51 | 8.10 ± 2.59 |
| Cirripeda              |             |             |             | 0.08 ± 0.05 |              |             |             |             |
| Chironomidae           | 0.04 ± 0.04 | 0.31 ± 0.19 | 0.02 ± 0.02 | 0.28 ± 0.22 |              |             |             |             |
| Isopoda                |             |             |             | 0.29 ± 0.15 | 0.06 ± 0.06  |             |             |             |
| Amphipoda              | 0.06 ± 0.06 | 0.50 ± 0.38 | 0.02 ± 0.02 | 0.40 ± 0.15 | 0.13 ± 0.07  | 0.02 ± 0.02 |             |             |
| Halacaridae            | 0.00 ± 0.00 | 0.23 ± 0.23 |             | 0.07 ± 0.07 |              |             |             |             |
| Polychaeta             | 0.05 ± 0.05 | 0.08 ± 0.08 | 0.05 ± 0.03 | 0.53 ± 0.12 |              |             |             |             |
| Gastropoda             | 0.16 ± 0.10 | 0.61 ± 0.47 | 0.08 ± 0.05 | 2.90 ± 2.33 | 0.17 ± 0.17  |             |             |             |
| Bivalvia               | 0.17 ± 0.11 | 0.20 ± 0.20 |             |             |              |             |             | 0.11 ± 0.08 |

**Table S9.** Results of one-way PERMANOVA and pairwise comparisons carried out on the number of taxa (S) and on total density (N) of meiobenthos taken in Passetto (PAS) and Porto (POR) for each macroalga: *Cystoseira compressa* (CC), *Dictyota dichotoma* (DD), *Ulva cf. lacinulata* (UL), *Dictyopteris polypodioides* (DP) and *Sargassum muticum* (SM).

|                     |    | N° of Taxa   |          |         | Total abundance |          |         |
|---------------------|----|--------------|----------|---------|-----------------|----------|---------|
| Source of Variation | df | MS           | Pseudo-F | P(perm) | MS              | Pseudo-F | P(perm) |
| Site-Macroalgae     | 7  | 16.67        | 13.23    | 0.0001  | 101.49          | 2.15     | 0.049   |
| Error               | 24 | 1.26         |          |         | 47.21           |          |         |
| Total:              | 31 |              |          |         |                 |          |         |
| Comparisons         |    | P(MC)        |          |         | P(MC)           |          |         |
| PAS-CC vs PAS-DD    |    | 0.466        |          |         | <b>0.003</b>    |          |         |
| PAS-CC vs PAS-UL    |    | 0.715        |          |         | <b>0.032</b>    |          |         |
| PAS-CC vs PAS-DP    |    | <b>0.004</b> |          |         | 0.089           |          |         |
| PAS-DD vs PAS-UL    |    | 0.793        |          |         | <b>0.000</b>    |          |         |
| PAS-DD vs PAS-DP    |    | <b>0.014</b> |          |         | 0.418           |          |         |
| PAS-UL vs PAS-DP    |    | <b>0.009</b> |          |         | 0.031           |          |         |
| POR-SM vs POR-DD    |    | 0.194        |          |         | 0.177           |          |         |
| POR-SM vs POR-UL    |    | 0.146        |          |         | 0.176           |          |         |
| POR-SM vs POR-DP    |    | 0.744        |          |         | 0.580           |          |         |
| POR-DD vs POR-UL    |    | 0.623        |          |         | 0.927           |          |         |
| POR-DD vs POR-DP    |    | 0.168        |          |         | <b>0.032</b>    |          |         |
| POR-UL vs POR-DP    |    | 0.137        |          |         | <b>0.025</b>    |          |         |
| PAS-DD vs POR-DD    |    | <b>0.017</b> |          |         | <b>0.001</b>    |          |         |
| PAS-UL vs POR-UL    |    | <b>0.023</b> |          |         | 0.347           |          |         |
| PAS-DP vs POR-DP    |    | <b>0.002</b> |          |         | 0.964           |          |         |

**Table S10.** Results of PERMANOVA and pairwise comparison test carried out on meiobenthic community, taken in Passetto (PAS) and Porto (POR) for each macroalga: *Cystoseira compressa* (CC), *Dictyota dichotoma* (DD), *Ulva* cf. *lacinulata* (UL), *Dictyopteris polypodioides* (DP) and *Sargassum muticum* (SM).

| Source of Variation | df           | MS      | F    | P(perm) |
|---------------------|--------------|---------|------|---------|
| Site-Macroalgae     | 7            | 2954.90 | 4.58 | 0.0001  |
| Error               | 24           | 645.32  |      |         |
| Total:              | 31           |         |      |         |
| Comparisons         | P(MC)        |         |      |         |
| PAS-CC vs PAS-DD    | 0.236        |         |      |         |
| PAS-CC vs PAS-UL    | 0.250        |         |      |         |
| PAS-CC vs PAS-DP    | <b>0.008</b> |         |      |         |
| PAS-DD vs PAS-UL    | <b>0.007</b> |         |      |         |
| PAS-DD vs PAS-DP    | 0.078        |         |      |         |
| PAS-UL vs PAS-DP    | <b>0.004</b> |         |      |         |
| POR-SM vs POR-DD    | 0.064        |         |      |         |
| POR-SM vs POR-UL    | <b>0.046</b> |         |      |         |
| POR-SM vs POR-DP    | 0.553        |         |      |         |
| POR-DD vs POR-UL    | 0.729        |         |      |         |
| POR-DD vs POR-DP    | <b>0.011</b> |         |      |         |
| POR-UL vs POR-DP    | <b>0.010</b> |         |      |         |
| PAS-DD vs POR-DD    | <b>0.014</b> |         |      |         |
| PAS-UL vs POR-UL    | <b>0.028</b> |         |      |         |
| PAS-DP vs POR-DP    | <b>0.003</b> |         |      |         |

**Table S11.** Results of SIMPER analysis based on four root transformed data, used to identify organisms that mostly contribute to meiobenthos dissimilarity among site-macroalgae (Cut-off 60%). Av.Ab, mean abundance; Diss, mean dissimilarity; Diss/SD, dissimilarity/standard deviation; Contrib%, contribution relative to single taxon; Cum%, cumulative contribution.

| Groups PAS-CC & PAS-DD |              | Average dissimilarity = 42.39 |         |         |          |       |  |
|------------------------|--------------|-------------------------------|---------|---------|----------|-------|--|
|                        | Group PAS-CC | Group PAS-DD                  |         |         |          |       |  |
| Species                | Av.Abund     | Av.Abund                      | Av.Diss | Diss/SD | Contrib% | Cum.% |  |
| Harpacticoida          | 0.75         | 1.45                          | 8.50    | 2.54    | 20.05    | 20.05 |  |
| Amphipoda              | 0.12         | 0.47                          | 6.05    | 0.98    | 14.28    | 34.33 |  |
| Gastropoda             | 0.28         | 0.52                          | 5.94    | 1.15    | 14.02    | 48.34 |  |
| Copepod <i>nauplii</i> | 1.32         | 1.66                          | 4.90    | 1.13    | 11.55    | 59.90 |  |
| Chironomidae           | 0.10         | 0.39                          | 4.36    | 1.14    | 10.30    | 70.19 |  |
| Groups PAS-CC & PAS-UL |              | Average dissimilarity = 37.61 |         |         |          |       |  |
|                        | Group PAS-CC | Group PAS-UL                  |         |         |          |       |  |
| Species                | Av.Abund     | Av.Abund                      | Av.Diss | Diss/SD | Contrib% | Cum.% |  |
| Copepod <i>nauplii</i> | 1.32         | 0.97                          | 8.34    | 1.79    | 22.16    | 22.16 |  |
| Bivalvia               | 0.29         | 0.00                          | 5.50    | 0.94    | 14.62    | 36.78 |  |
| Gastropoda             | 0.28         | 0.19                          | 5.27    | 1.16    | 14.01    | 50.79 |  |
| Harpacticoida          | 0.75         | 0.50                          | 5.23    | 1.61    | 13.90    | 64.69 |  |
| Nematoda               | 0.10         | 0.22                          | 4.01    | 1.58    | 10.67    | 75.36 |  |
| Groups PAS-CC & PAS-DP |              | Average dissimilarity = 58.69 |         |         |          |       |  |
|                        | Group PAS-CC | Group PAS-DP                  |         |         |          |       |  |
| Species                | Av.Abund     | Av.Abund                      | Av.Diss | Diss/SD | Contrib% | Cum.% |  |
| Harpacticoida          | 0.75         | 1.85                          | 10.20   | 3.71    | 17.38    | 17.38 |  |
| Gastropoda             | 0.28         | 1.20                          | 8.91    | 1.15    | 15.18    | 32.56 |  |
| Polychaeta             | 0.12         | 0.71                          | 6.28    | 1.77    | 10.70    | 43.27 |  |
| Copepod <i>nauplii</i> | 1.32         | 1.04                          | 6.10    | 1.30    | 10.40    | 53.66 |  |
| Nematoda               | 0.10         | 0.68                          | 6.01    | 1.93    | 10.24    | 63.90 |  |
| Isopoda                | 0.00         | 0.49                          | 4.60    | 3.79    | 7.83     | 71.74 |  |
| Groups PAS-DD & PAS-UL |              | Average dissimilarity = 53.72 |         |         |          |       |  |
|                        | Group PAS-DD | Group PAS-UL                  |         |         |          |       |  |
| Species                | Av.Abund     | Av.Abund                      | Av.Diss | Diss/SD | Contrib% | Cum.% |  |
| Harpacticoida          | 1.45         | 0.50                          | 12.96   | 4.72    | 24.12    | 24.12 |  |
| Copepod <i>nauplii</i> | 1.66         | 0.97                          | 9.60    | 2.07    | 17.87    | 42.00 |  |
| Amphipoda              | 0.47         | 0.07                          | 6.93    | 0.98    | 12.91    | 54.90 |  |
| Gastropoda             | 0.52         | 0.19                          | 6.50    | 1.14    | 12.11    | 67.01 |  |
| Chironomidae           | 0.39         | 0.08                          | 4.77    | 1.09    | 8.89     | 75.90 |  |
| Groups PAS-DD & PAS-DP |              | Average dissimilarity = 46.77 |         |         |          |       |  |
|                        | Group PAS-DD | Group PAS-DP                  |         |         |          |       |  |
| Species                | Av.Abund     | Av.Abund                      | Av.Diss | Diss/SD | Contrib% | Cum.% |  |
| Gastropoda             | 0.52         | 1.20                          | 7.97    | 1.19    | 17.03    | 17.03 |  |
| Copepod <i>nauplii</i> | 1.66         | 1.04                          | 6.39    | 1.22    | 13.65    | 30.69 |  |
| Nematoda               | 0.24         | 0.68                          | 4.89    | 1.88    | 10.45    | 41.14 |  |
| Polychaeta             | 0.14         | 0.71                          | 4.87    | 1.76    | 10.41    | 51.54 |  |
| Amphipoda              | 0.47         | 0.54                          | 4.08    | 1.14    | 8.73     | 60.28 |  |
| Isopoda                | 0.00         | 0.49                          | 3.78    | 3.45    | 8.07     | 68.35 |  |
| Chironomidae           | 0.39         | 0.36                          | 3.37    | 1.09    | 7.21     | 75.56 |  |
| Groups PAS-UL & PAS-DP |              | Average dissimilarity = 60.80 |         |         |          |       |  |
|                        | Group PAS-UL | Group PAS-DP                  |         |         |          |       |  |
| Species                | Av.Abund     | Av.Abund                      | Av.Diss | Diss/SD | Contrib% | Cum.% |  |
| Harpacticoida          | 0.5          | 1.9                           | 14.0    | 10.2    | 23.0     | 23.0  |  |
| Gastropoda             | 0.2          | 1.2                           | 9.5     | 1.1     | 15.6     | 38.7  |  |
| Polychaeta             | 0.2          | 0.7                           | 6.6     | 1.8     | 10.8     | 49.5  |  |
| Nematoda               | 0.2          | 0.7                           | 5.5     | 1.7     | 9.1      | 58.6  |  |

|                        |                               |              |         |         |          |       |
|------------------------|-------------------------------|--------------|---------|---------|----------|-------|
| Copepod <i>nauplii</i> | 1.0                           | 1.0          | 5.1     | 1.7     | 8.4      | 67.0  |
| Isopoda                | 0.0                           | 0.5          | 5.1     | 3.9     | 8.3      | 75.3  |
| Groups POR-SM & POR-DD | Average dissimilarity = 45.59 |              |         |         |          |       |
|                        | Group POR-SM                  | Group POR-DD |         |         |          |       |
| Species                | Av.Abund                      | Av.Abund     | Av.Diss | Diss/SD | Contrib% | Cum.% |
| Copepod <i>nauplii</i> | 3.11                          | 1.25         | 25.13   | 1.73    | 55.11    | 55.11 |
| Harpacticoida          | 1.18                          | 0.57         | 9.66    | 2.09    | 21.19    | 76.31 |
| Groups POR-SM & POR-UL | Average dissimilarity = 48.98 |              |         |         |          |       |
|                        | Group POR-SM                  | Group POR-UL |         |         |          |       |
| Species                | Av.Abund                      | Av.Abund     | Av.Diss | Diss/SD | Contrib% | Cum.% |
| Copepod <i>nauplii</i> | 3.11                          | 1.29         | 24.81   | 1.7     | 50.66    | 50.66 |
| Harpacticoida          | 1.18                          | 0.37         | 12.21   | 2.28    | 24.92    | 75.58 |
| Groups POR-SM & POR-DP | Average dissimilarity = 33.32 |              |         |         |          |       |
|                        | Group POR-SM                  | Group POR-DP |         |         |          |       |
| Species                | Av.Abund                      | Av.Abund     | Av.Diss | Diss/SD | Contrib% | Cum.% |
| Copepod <i>nauplii</i> | 3.11                          | 2.73         | 17.01   | 1.66    | 51.05    | 51.05 |
| Harpacticoida          | 1.18                          | 1.23         | 3.62    | 1.31    | 10.85    | 61.91 |
| Nematoda               | 0.20                          | 0.00         | 2.98    | 0.55    | 8.94     | 70.84 |
| Groups POR-DD & POR-UL | Average dissimilarity = 23.59 |              |         |         |          |       |
|                        | Group POR-DD                  | Group POR-UL |         |         |          |       |
| Species                | Av.Abund                      | Av.Abund     | Av.Diss | Diss/SD | Contrib% | Cum.% |
| Copepod <i>nauplii</i> | 1.25                          | 1.29         | 10.89   | 1.36    | 46.16    | 46.16 |
| Harpacticoida          | 0.57                          | 0.37         | 9.02    | 1.61    | 38.24    | 84.41 |
| Groups POR-DD & POR-DP | Average dissimilarity = 42.35 |              |         |         |          |       |
|                        | Group POR-DD                  | Group POR-DP |         |         |          |       |
| Species                | Av.Abund                      | Av.Abund     | Av.Diss | Diss/SD | Contrib% | Cum.% |
| Copepod <i>nauplii</i> | 1.25                          | 2.73         | 22.59   | 1.88    | 53.34    | 53.34 |
| Harpacticoida          | 0.57                          | 1.23         | 11.59   | 1.84    | 27.38    | 80.72 |
| Groups POR-UL & POR-DP | Average dissimilarity = 43.78 |              |         |         |          |       |
|                        | Group POR-UL                  | Group POR-DP |         |         |          |       |
| Species                | Av.Abund                      | Av.Abund     | Av.Diss | Diss/SD | Contrib% | Cum.% |
| Copepod <i>nauplii</i> | 1.29                          | 2.73         | 21.99   | 1.85    | 50.23    | 50.23 |
| Harpacticoida          | 0.37                          | 1.23         | 14.5    | 2.19    | 33.12    | 83.35 |
| Groups PAS-DD & POR-DD | Average dissimilarity = 49.11 |              |         |         |          |       |
|                        | Group PAS-DD                  | Group POR-DD |         |         |          |       |
| Species                | Av.Abund                      | Av.Abund     | Av.Diss | Diss/SD | Contrib% | Cum.% |
| Harpacticoida          | 1.45                          | 0.57         | 12.92   | 2.25    | 26.31    | 26.31 |
| Amphipoda              | 0.47                          | 0.08         | 7.29    | 0.96    | 14.85    | 41.16 |
| Copepod <i>nauplii</i> | 1.66                          | 1.25         | 6.85    | 1.23    | 13.95    | 55.1  |
| Gastropoda             | 0.52                          | 0            | 6.42    | 0.87    | 13.08    | 68.18 |
| Chironomidae           | 0.39                          | 0            | 4.84    | 0.95    | 9.86     | 78.05 |
| Groups PAS-UL & POR-UL | Average dissimilarity = 35.79 |              |         |         |          |       |
|                        | Group PAS-UL                  | Group POR-UL |         |         |          |       |
| Species                | Av.Abund                      | Av.Abund     | Av.Diss | Diss/SD | Contrib% | Cum.% |
| Copepod <i>nauplii</i> | 0.97                          | 1.29         | 10.24   | 1.29    | 28.62    | 28.62 |
| Harpacticoida          | 0.5                           | 0.37         | 6.15    | 1.32    | 17.17    | 45.8  |
| Nematoda               | 0.22                          | 0            | 5.49    | 1.63    | 15.34    | 61.14 |
| Gastropoda             | 0.19                          | 0            | 4.86    | 0.89    | 13.57    | 74.71 |
| Groups PAS-DP & POR-DP | Average dissimilarity = 60.34 |              |         |         |          |       |
|                        | Group PAS-DP                  | Group POR-DP |         |         |          |       |
| Species                | Av.Abund                      | Av.Abund     | Av.Diss | Diss/SD | Contrib% | Cum.% |
| Copepod <i>nauplii</i> | 1.04                          | 2.73         | 15.27   | 1.55    | 25.31    | 25.31 |
| Gastropoda             | 1.20                          | 0.00         | 8.40    | 1.03    | 13.91    | 39.23 |
| Polychaeta             | 0.71                          | 0.00         | 6.49    | 2.53    | 10.75    | 49.98 |
| Nematoda               | 0.68                          | 0.00         | 6.24    | 2.53    | 10.34    | 60.31 |

|               |      |      |      |      |      |       |
|---------------|------|------|------|------|------|-------|
| Harpacticoida | 1.85 | 1.23 | 5.00 | 1.70 | 8.28 | 68.60 |
| Amphipoda     | 0.54 | 0.00 | 4.19 | 1.62 | 6.95 | 75.55 |

---
